# Supplementary figures and images for: Novel 3D-Printed Dressings of Chitosan–Vanillin-Modified Chitosan Blends Loaded with Fluticasone Propionate for Treatment of Atopic Dermatitis
Source: MDPI journal article supplement (doi:10.3390/pharmaceutics14091966), 2022-09-18

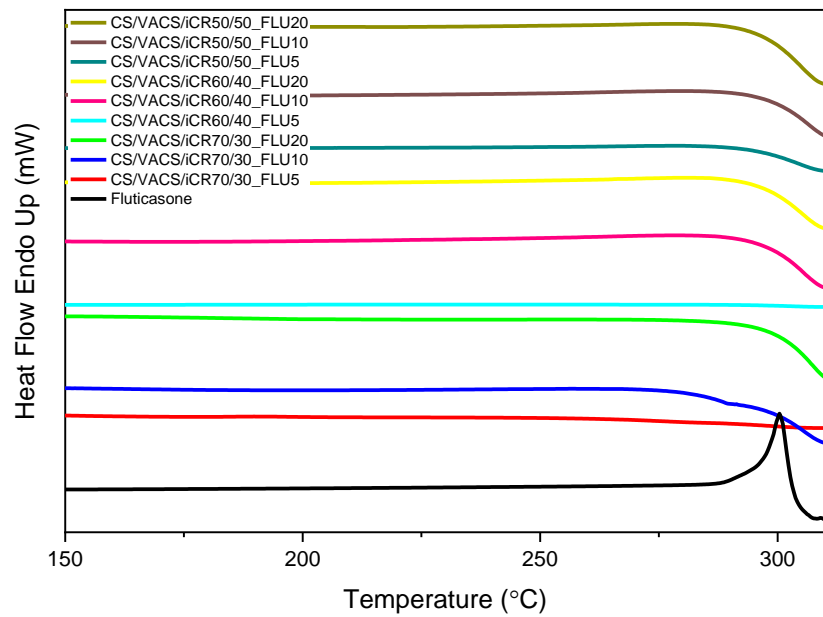

**Figure S1.** DSC curves of CS/VACS/iCR samples containing FLU in 5, 10 and 20 wt%.

Supplement: s1 [file s1]
